# Supplementary material
Source: Springer Nature journal article supplement (https://www.springerprofessional.de/resource/supplementary/40294_2012_1_MOESM3_ESM.pdf/11899522)

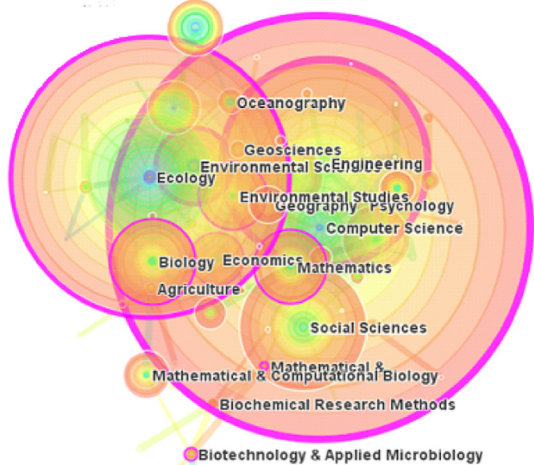

(a)

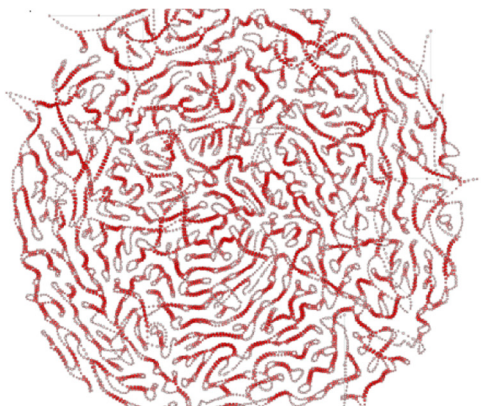

(b)

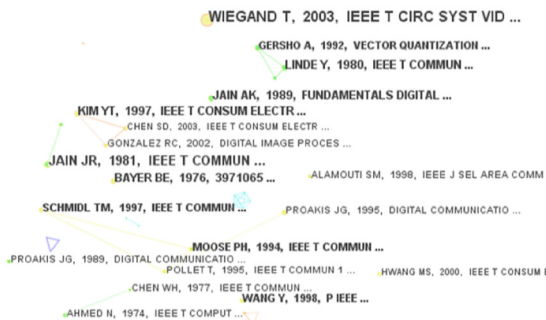

(c)

Supplement: MOESM3 [file 11899522]
